# Supplementary material for: Synthesis of high quality alkyl naphthenic kerosene by reacting an oil refinery with a biomass refinery stream
Source: Royal Society of Chemistry journal article supplement (doi:10.1039/c4ee03194f), 2014-11-06
Supplement: c4ee03194f1.pdf [file c4ee03194f1.pdf]

## Supplementary Information

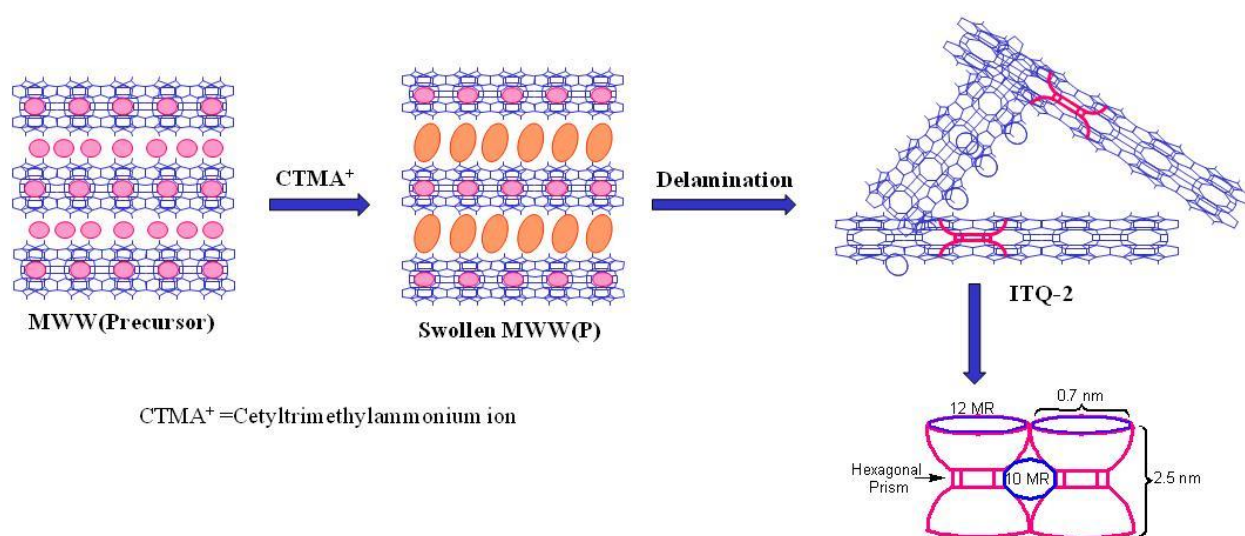

**Figure S1.** Schematic representation of the swelling step of MWW zeolite precursor with alkylammonium molecules followed by delamination giving a delaminated ITQ-2 zeolite conformed by disordered MWW sheets.

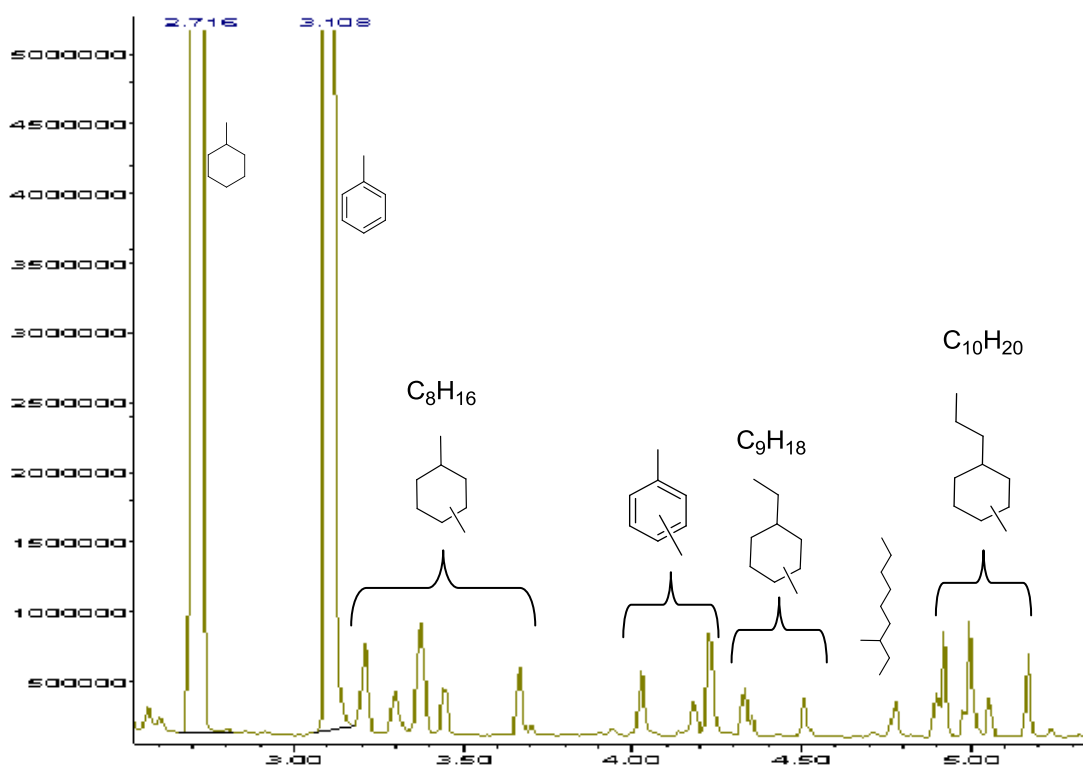

Figure S2. Analysis of the products boiling in the gasoline range (up to 200 °C).



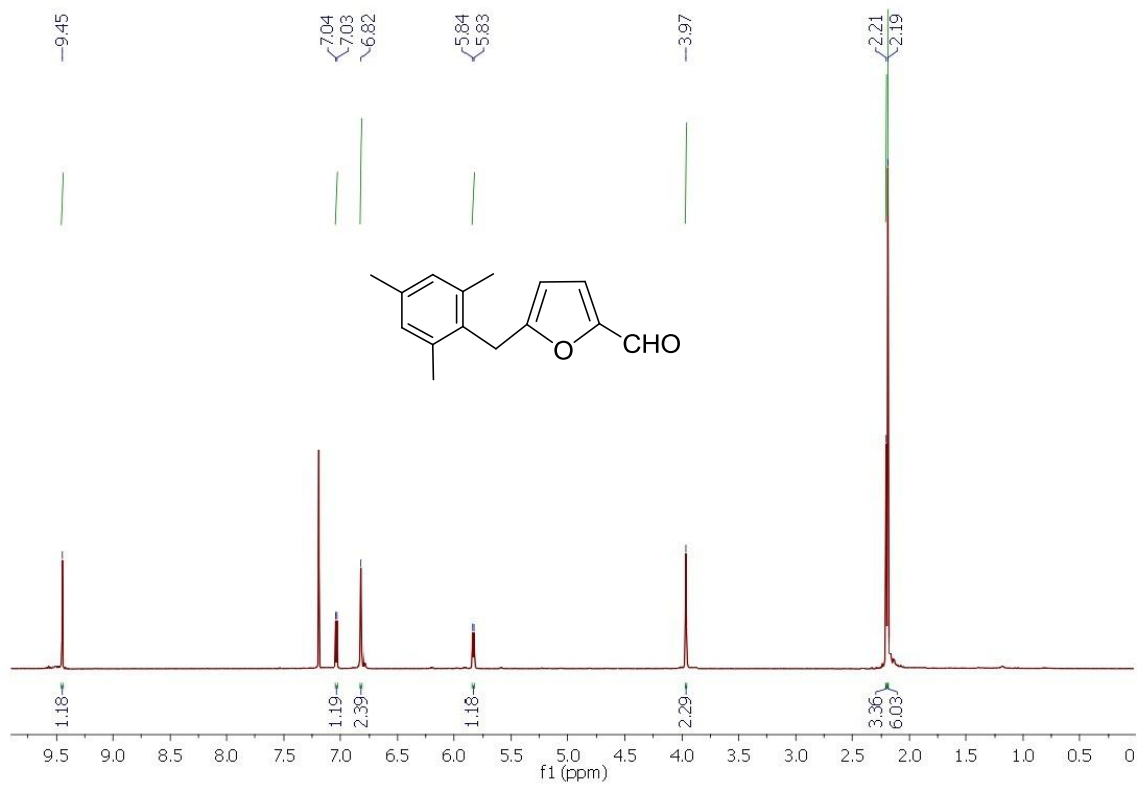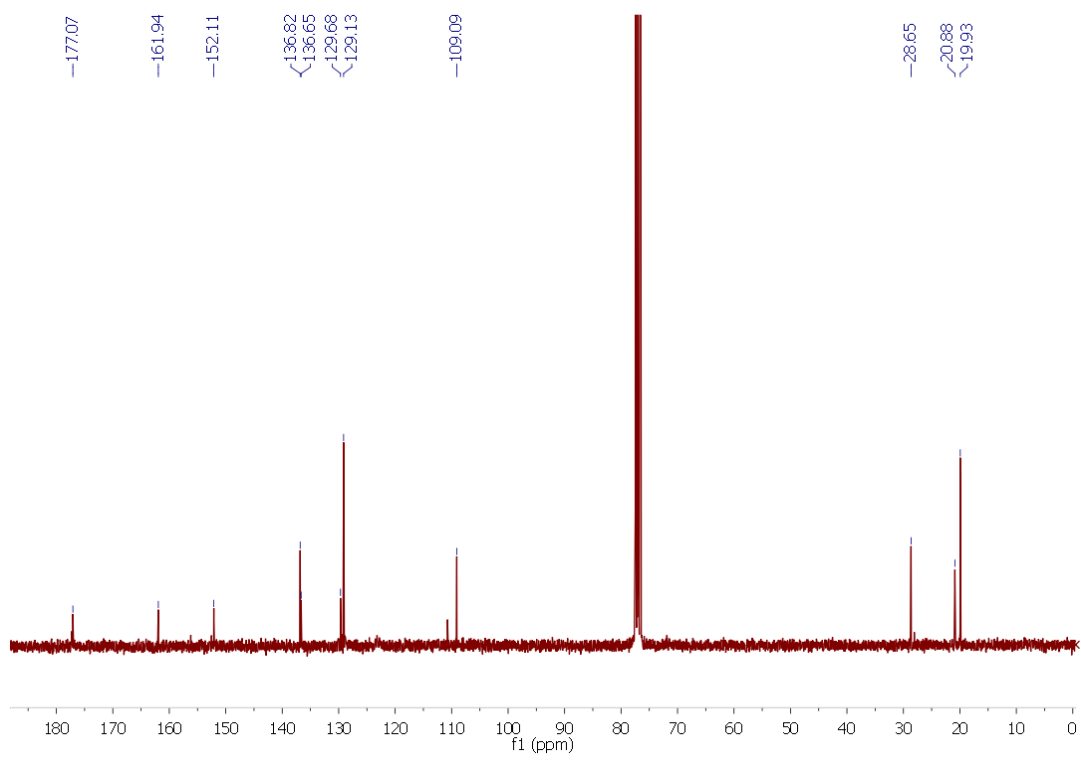

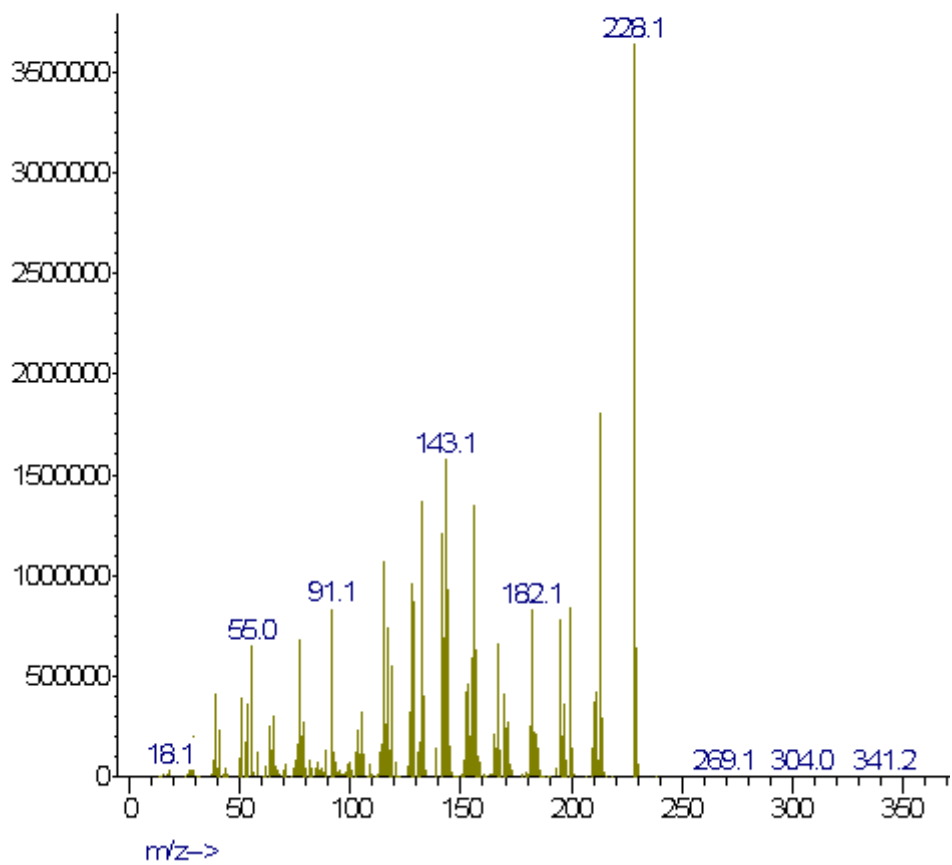

**Figure S3.** Mass and  $^1\text{H}$  and  $^{13}\text{C}$  spectra of the 5-(mesityl)benzylfuran-2-carbaldehyde.

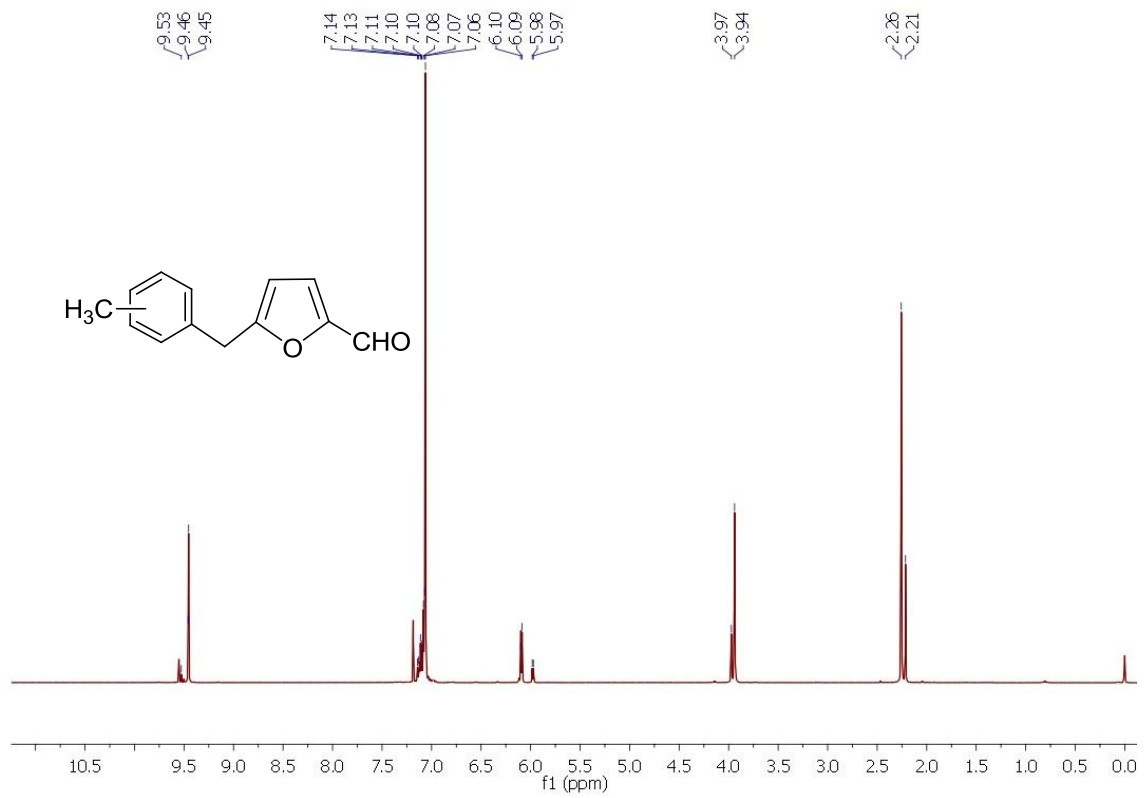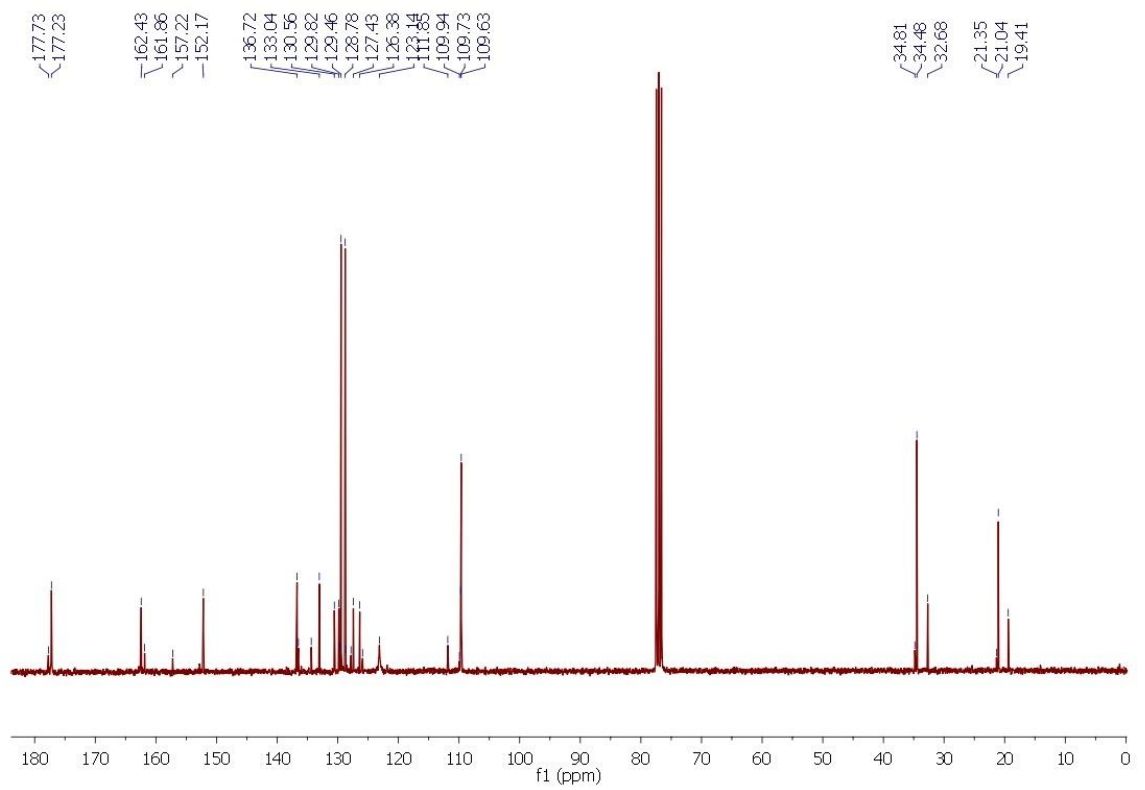

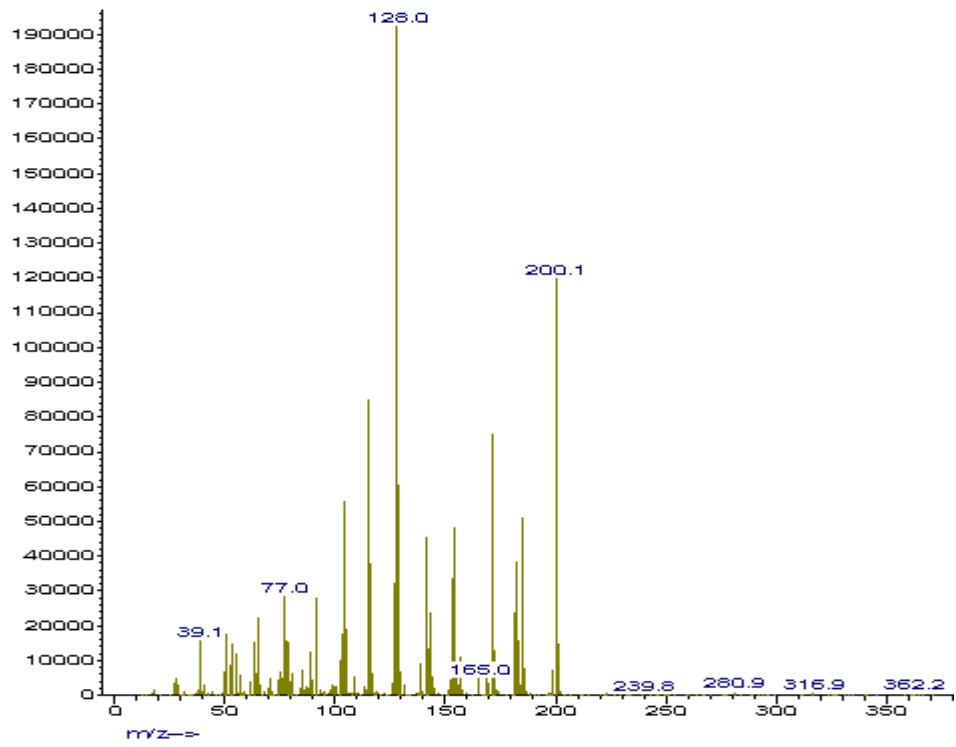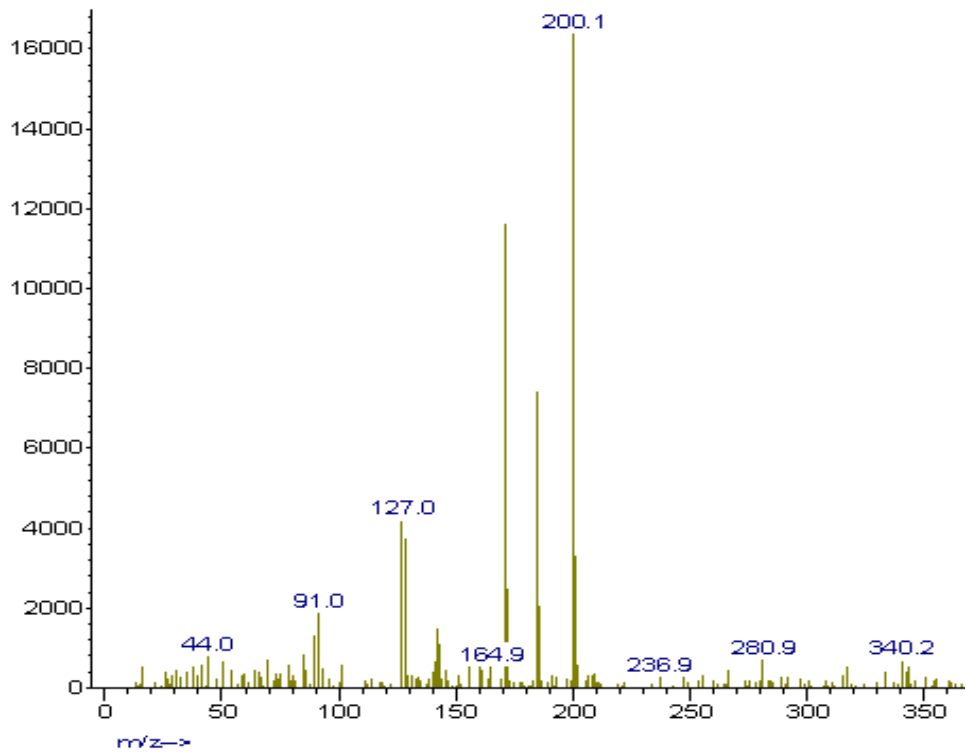

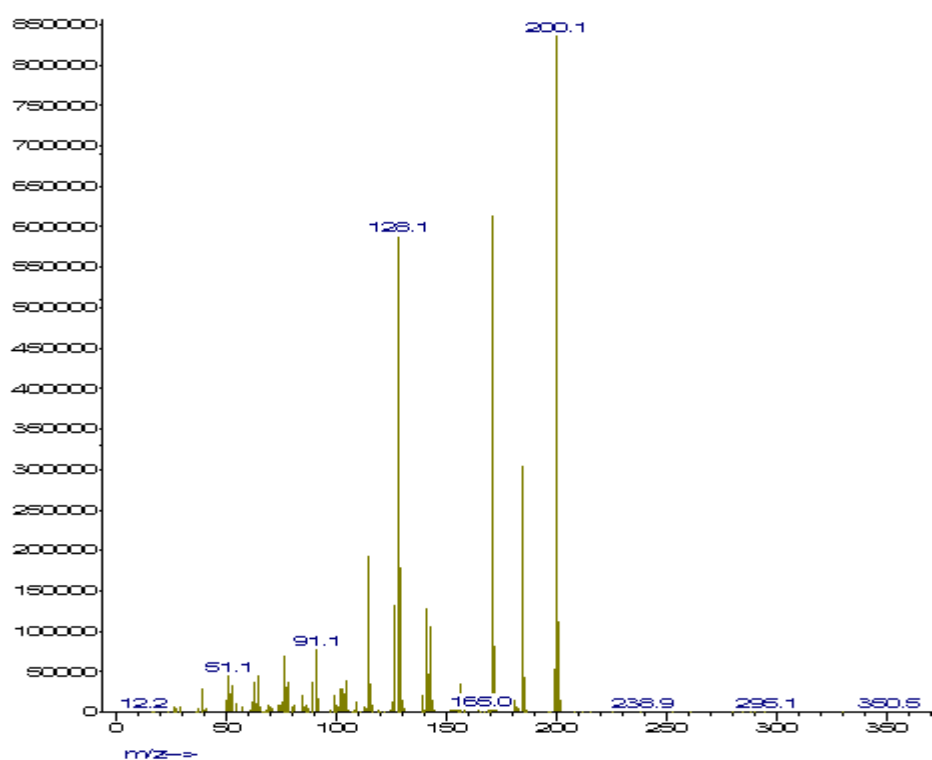

**Figure S4.** Mass and  $^1\text{H}$  and  $^{13}\text{C}$  spectra of the 5-(o-m and p-Methyl)benzylfuran-2-carbaldehyde.



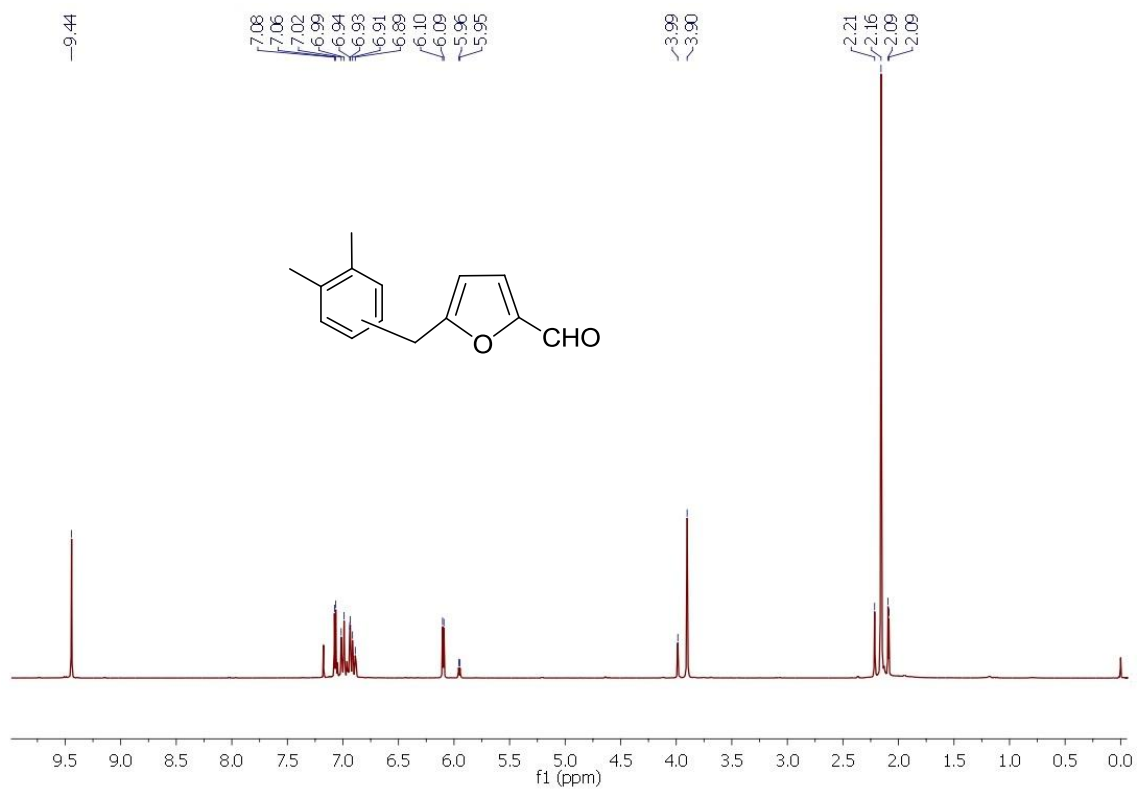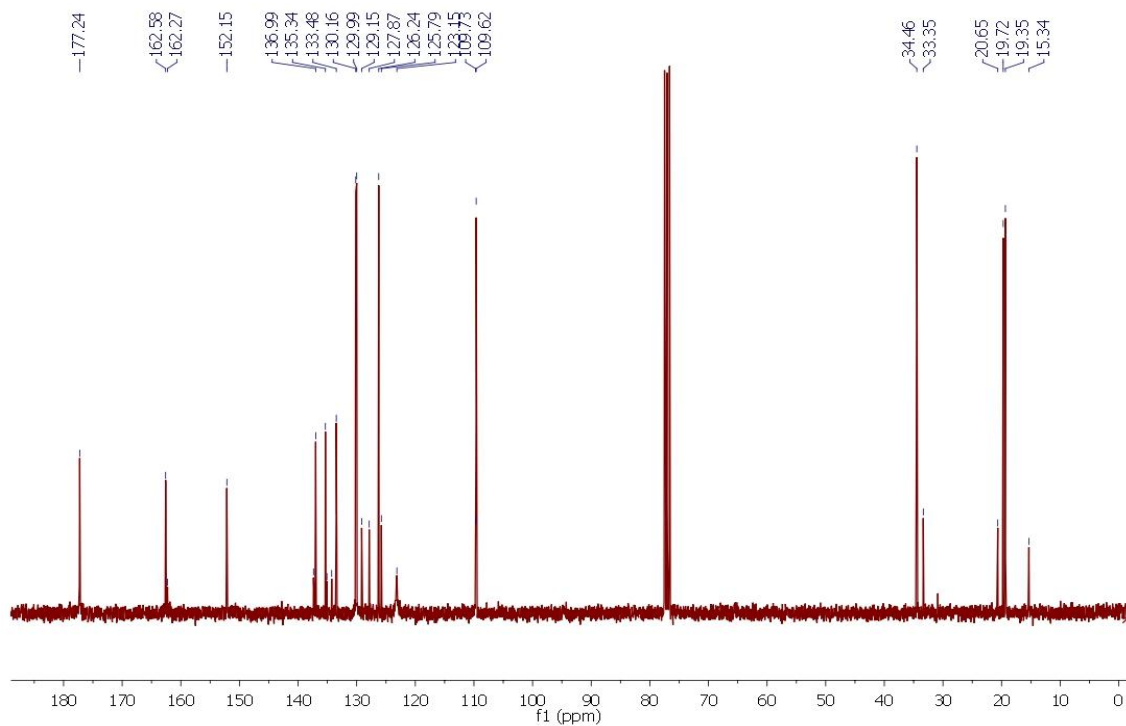

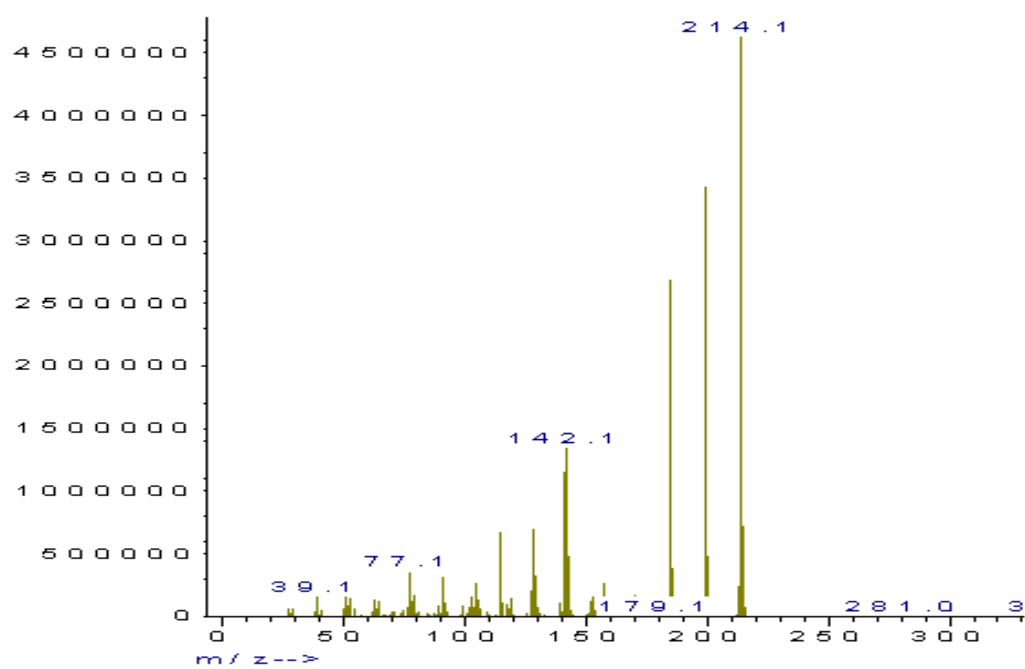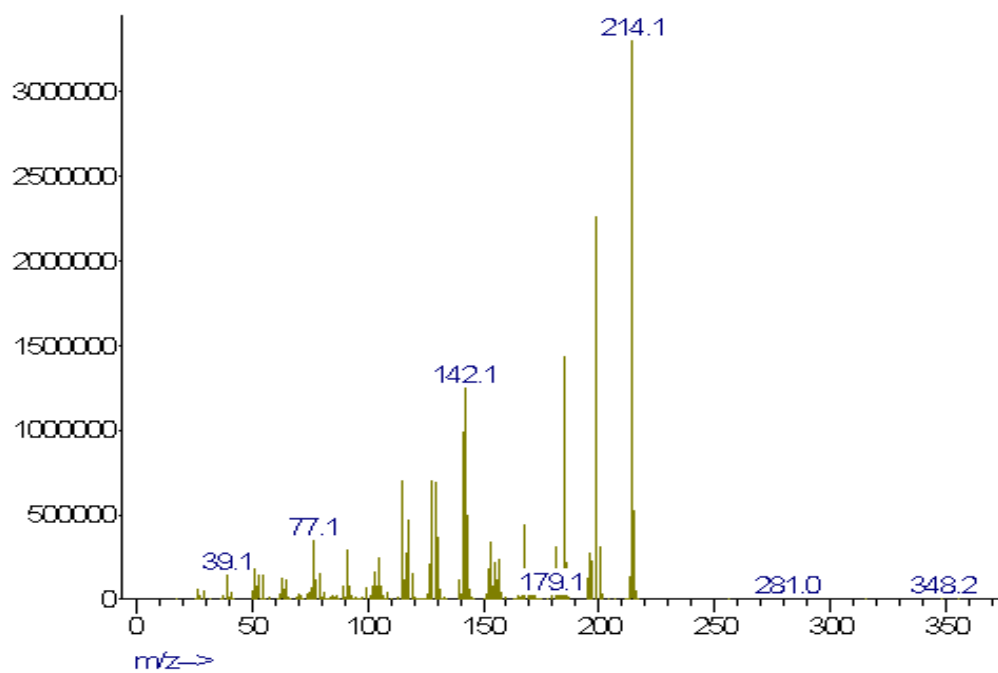

**Figure S5.** Mass and  $^1\text{H}$  and  $^{13}\text{C}$  spectra of the 5-(2,3-and 3,5-dimethyl)benzylfuran-2-carbaldehyde.

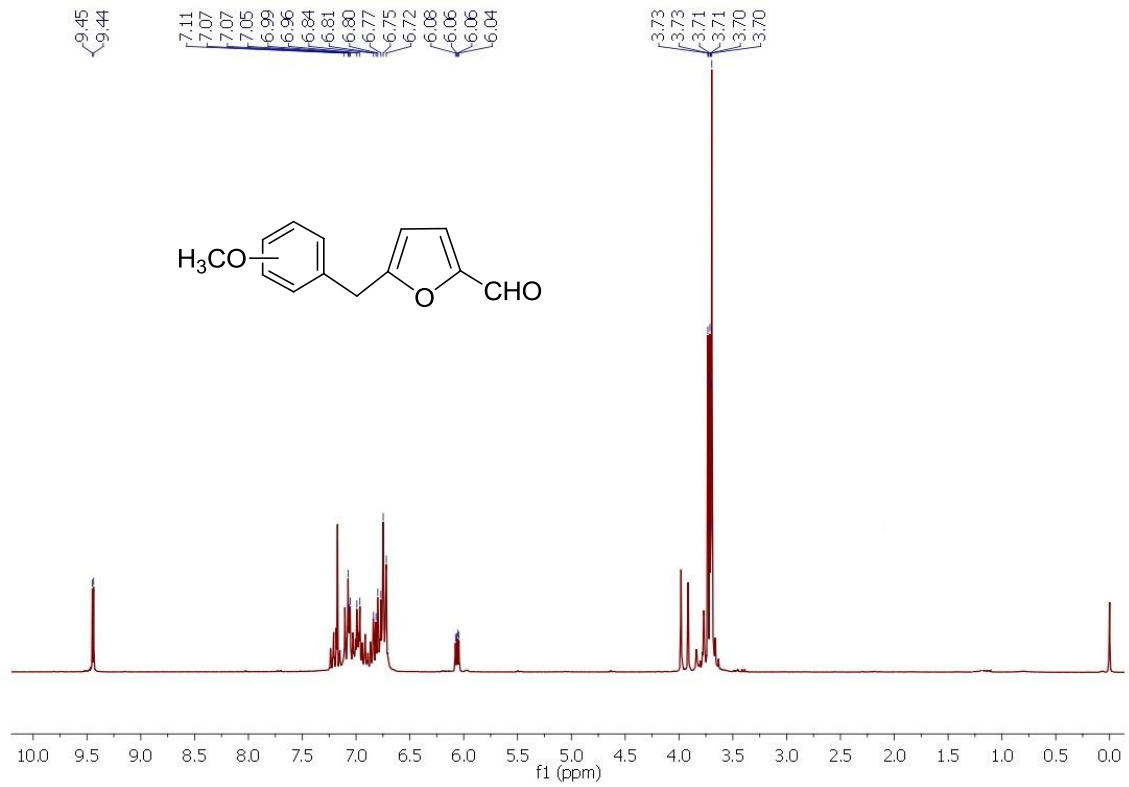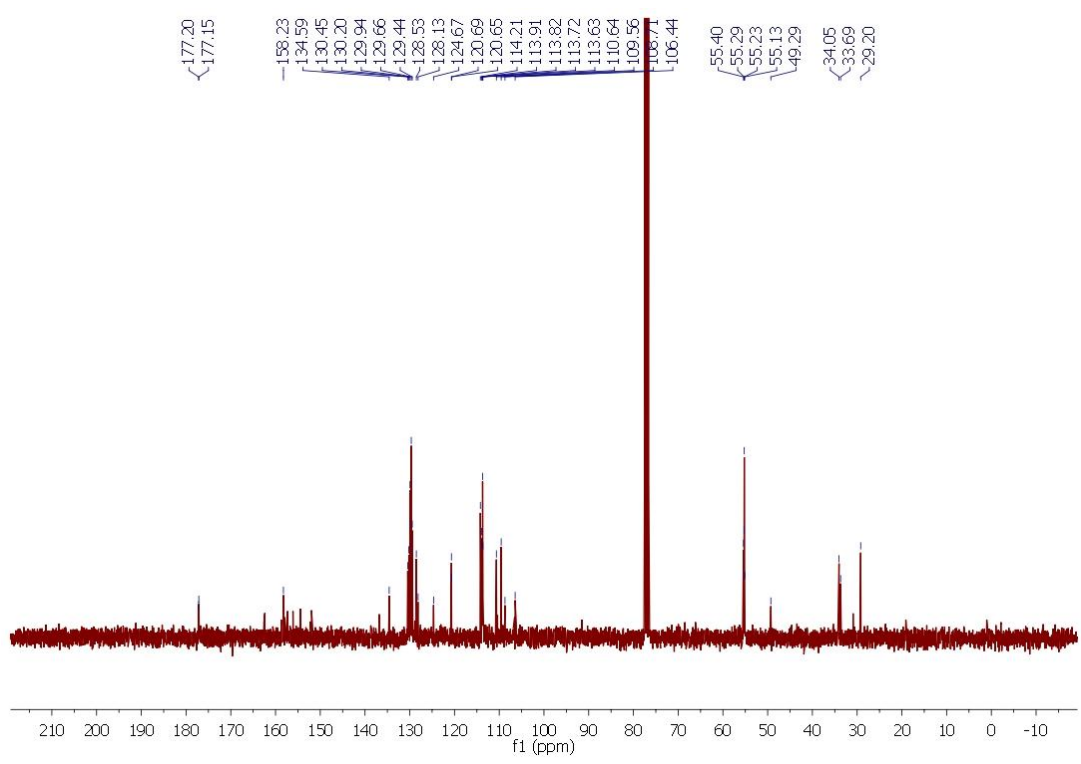

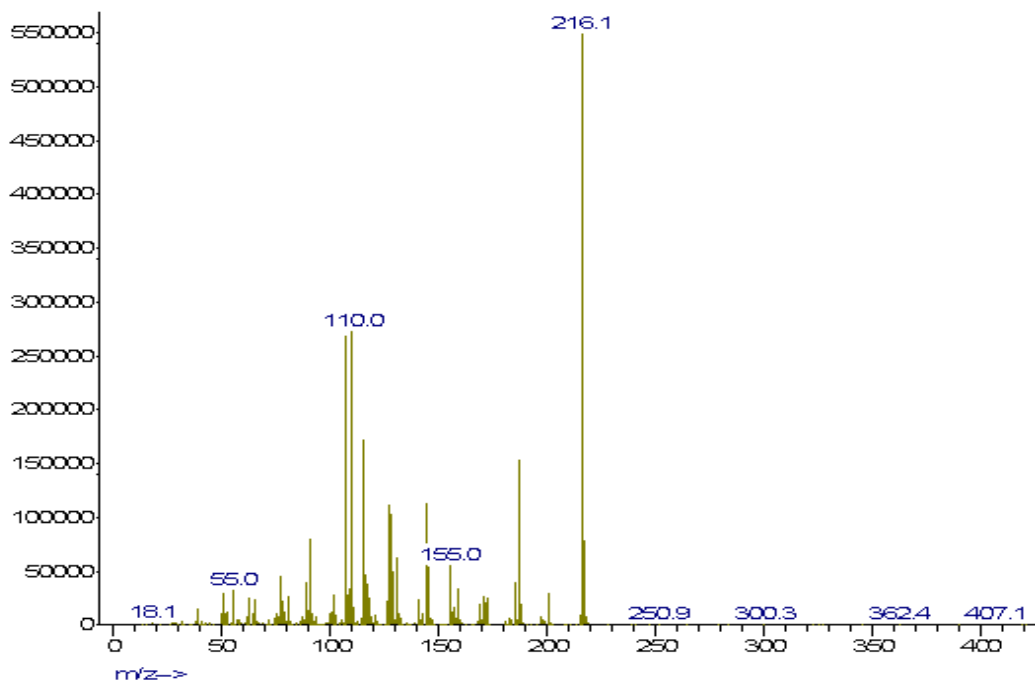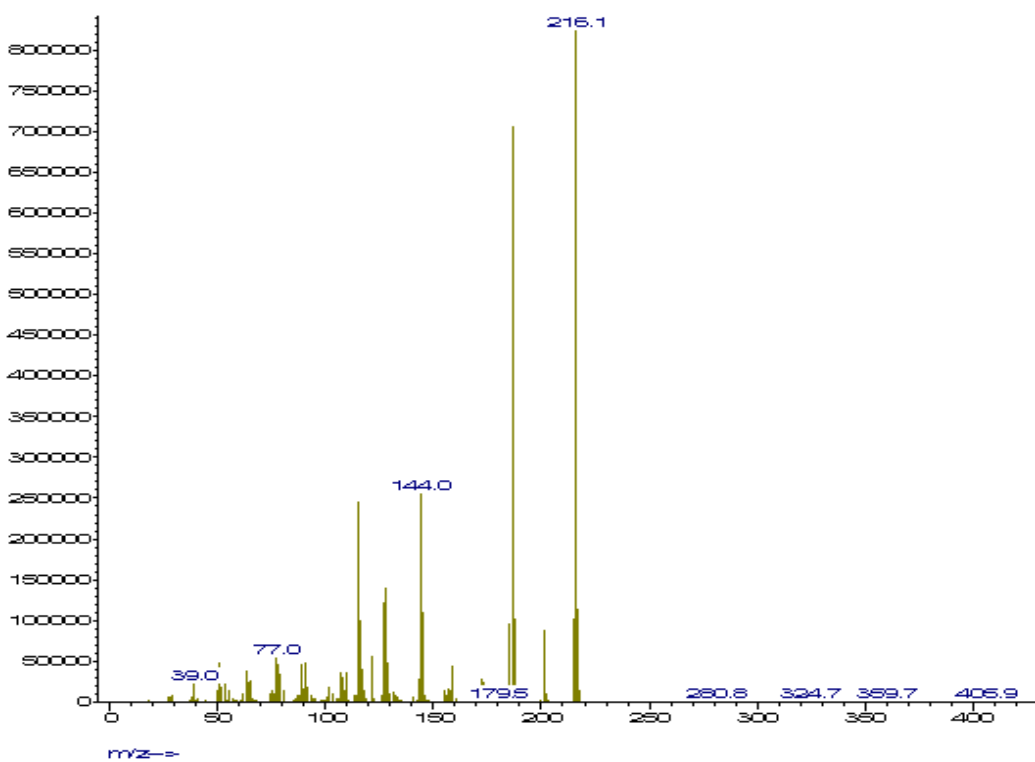

**Figure S6.** Mass and <sup>1</sup>H and <sup>13</sup>C spectra of the 5-(o and p-methoxy)benzylfuran-2-carbaldehyde.

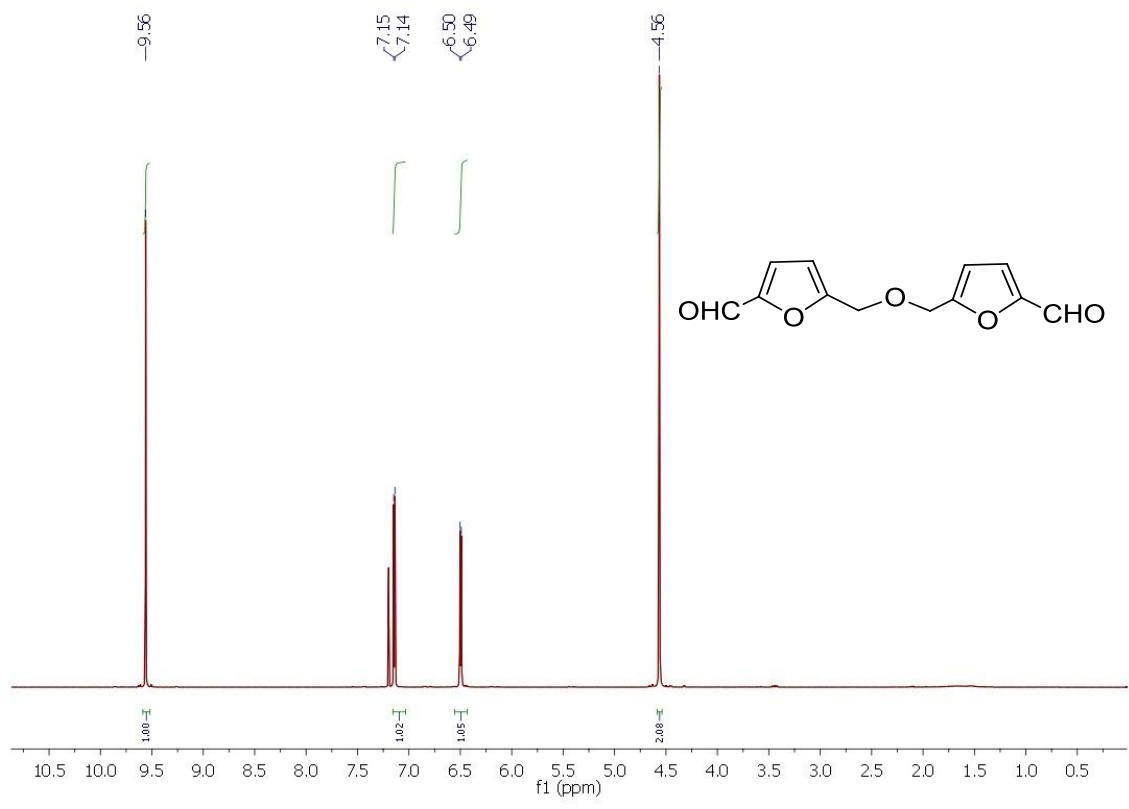

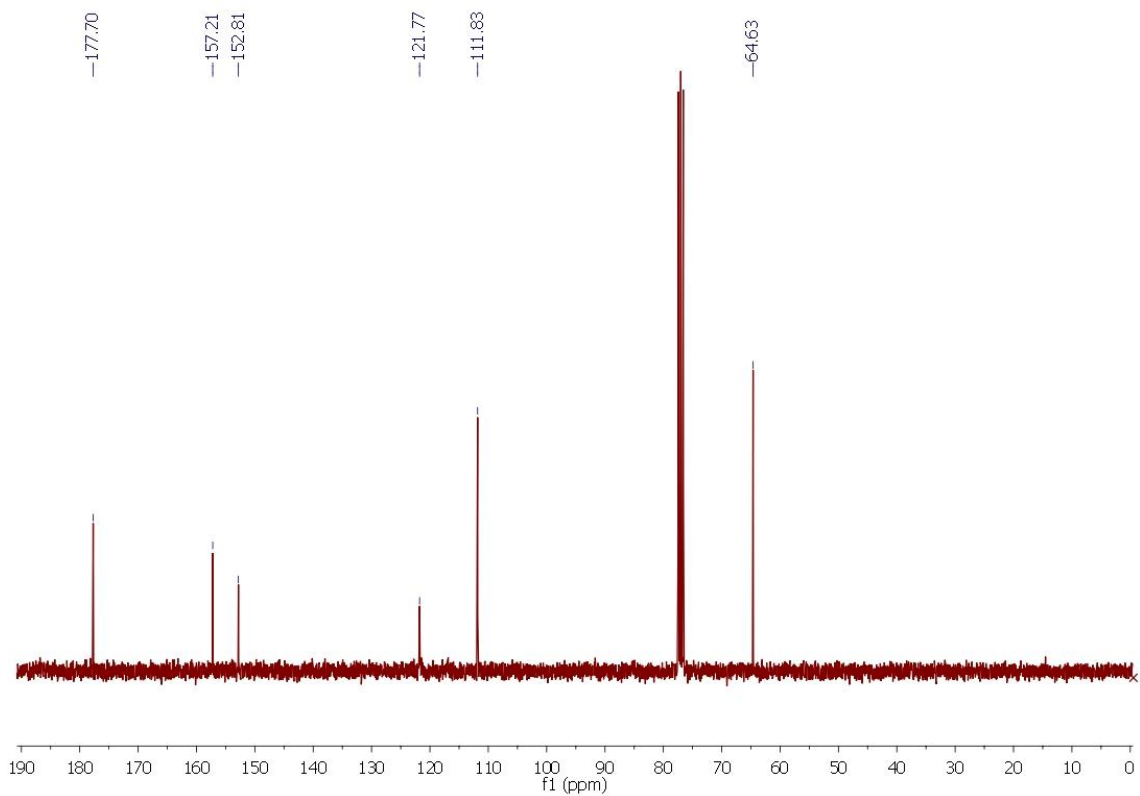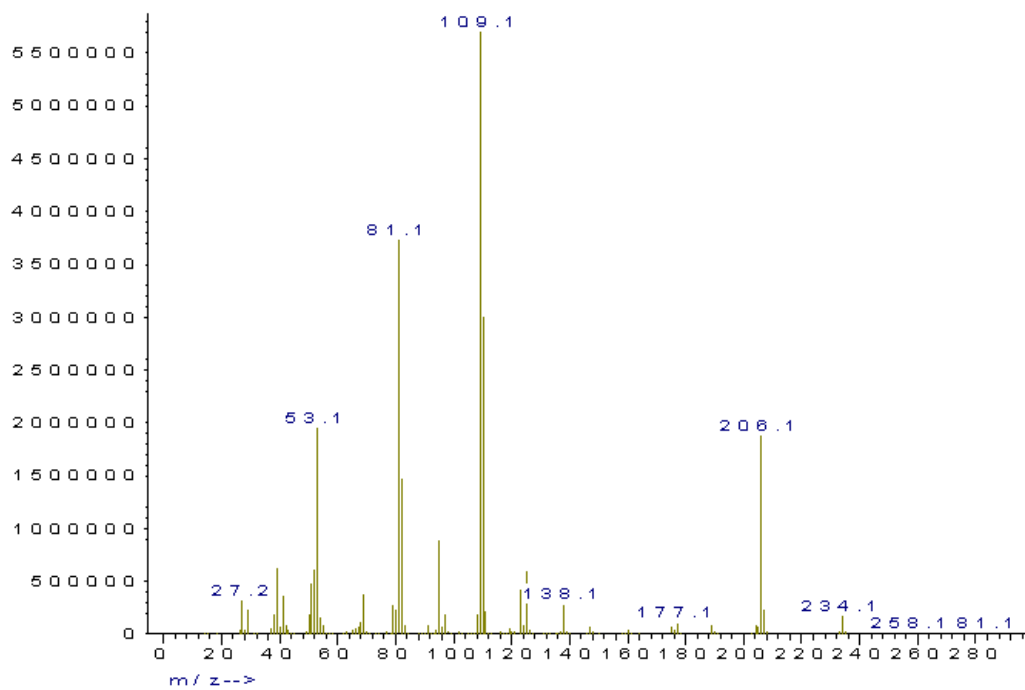

**Figure S7.** Mass and  $^1\text{H}$  and  $^{13}\text{C}$  spectra of the 5,5-oxy(bis-methylene)-2-furaldehyde.

Table S1. Crystal size of the different USY samples

| Catalyst | Si/Al | Crystal size (nm) |
|----------|-------|-------------------|
| USY-300  | 2.6   | 621               |
| USY-500  | 2.7   | 573               |
| USY-712  | 5.6   | 627               |
| USY-720  | 12.2  | 586               |
| USY-760  | 27    | 650               |
| USY-MY   | 4.3   | 541               |
| USY-HMY  | 5.3   | 513               |
